# Supplementary material for: Phages from Genus Bruynoghevirus and Phage Therapy: Pseudomonas Phage Delta Case
Source: MDPI journal article supplement (doi:10.3390/v13101965), 2021-09-30
Supplement: s1 [file s1]

Table S1. Predicted PaP3 related prophage in genome of *P. tolaasii* 2192T using various tools for prophage detection and manually predicted

| Prophage in <i>P. tolaasii</i> ( <a href="https://edwards.sdsu.edu/PhiSpy/upload.php?">https://edwards.sdsu.edu/PhiSpy/upload.php?</a> ) |                   |                     |        |              |
|------------------------------------------------------------------------------------------------------------------------------------------|-------------------|---------------------|--------|--------------|
| Tool                                                                                                                                     | Coordinates       | Size (kbp)/proteins | Score  | Completeness |
| PHASTER <sup>1</sup>                                                                                                                     | 6801317..6801790  | 54.6/76             | 140    | intact       |
| Prophage Hunter <sup>2</sup>                                                                                                             | 6769076..6815378  | 46.3/67             | 0.87/1 | active       |
|                                                                                                                                          | 6815378..6810263  | 24.5/39             | 0.73   | ambiguous    |
| Profinder <sup>3</sup>                                                                                                                   | 6763248 - 6815387 | 52.1/73             | 41.2   | N.A.         |
| Manually predicted <sup>4</sup>                                                                                                          | 6762867.. 6815803 | 52.9/72             | -      | -            |

<sup>1</sup> Arndt, D., Grant, J., Marcu, A., Sajed, T., Pon, A., Liang, Y., Wishart, D.S. (2016) PHASTER: a better, faster version of the PHAST phage search tool. Nucleic Acids Res., 2016 May 3. <https://phaster.ca/>

<sup>2</sup> Song, W., H. X. Sun, C. Zhang, L. Cheng, Y. Peng, Z. Deng, D. Wang, Y. Wang, M. Hu, W. Liu, H. Yang, Y. Shen, J. Li, L. You and M. Xiao (2019). "Prophage Hunter: an integrative hunting tool for active prophages." Nucleic Acids Res. <https://doi.org/10.1093/nar/gkz380> <https://pro-hunter.genomics.cn/>

<sup>3</sup> Lima-Mendez, G., van Helden, J., Toussaint, A., Leplae, R. 2008. Prophinder: a computational tool for prophage prediction in pro-karyotic genomes Bioinformatics [http://aclame.ulb.ac.be/Tools/Prophinder/aclame\\_hits.html](http://aclame.ulb.ac.be/Tools/Prophinder/aclame_hits.html)

<sup>4</sup> Manually prediction was based on the alignment (a part is shown below)

|                                |                                                               |      |
|--------------------------------|---------------------------------------------------------------|------|
| gb CP020369.1 :6813515-6816088 | ACTTGACCGCCAGATGCAGATGGGCGTAATGCTCAACAAGAACCGCGAGGCTGCCTTGGGA | 1607 |
| gb CP020369.1 :6766573-6781964 | CAGCTCCACACAGATGCAGATGGGCGTAATGCTCAACAAGAACCGCGAGGCTGCCTTGGGA | 2551 |
|                                | *****                                                         |      |
| gb CP020369.1 :6813515-6816088 | TCGTCAACTTAAGGAGCGTGAGGTTACTGTCAAGGAGAAGACTGGTGACTCCCAAGTCAA  | 1667 |
| gb CP020369.1 :6766573-6781964 | TCGTCAAGTCAAGGAACGTGAGGTTACAGTCAAGGAGAAGACTGGGGATTCCCAAGTGAA  | 2611 |
|                                | *****                                                         |      |
| gb CP020369.1 :6813515-6816088 | AGTAGGTGAGGGTAACCTTGCTGTCAACCAAGGTAACTTGCGAATGACACTACCAAGAC   | 1727 |
| gb CP020369.1 :6766573-6781964 | GGTAGGTGAGGGCAACCTCGCTGTCAACCAAGGGAAGCTTAAGAACGACACCGTTAAAC   | 2671 |
|                                | *****                                                         |      |
| gb CP020369.1 :6813515-6816088 | CAAGGGCATCATCACCAAGTGGGACAACGACAACCGTAATGCTCAGGCATCTAATGCCAC  | 1787 |
| gb CP020369.1 :6766573-6781964 | TGGTGGCATCCTGAACAAGTGGGACAACGATAACAAGAAGCTCAAGCTGCTAACGCTAC   | 2731 |
|                                | *****                                                         |      |
| gb CP020369.1 :6813515-6816088 | CAAGCGCTATGGTATGACGTGGGTGCATCCACAGCTATCCGTGGTCAAGACCTCCGGGC   | 1847 |
| gb CP020369.1 :6766573-6781964 | CAAGCGCTACGGTATTGACGTGGGGCATCTACAGCTATCCGTGGTCAAGACTTCCGTGA   | 2791 |
|                                | *****                                                         |      |
| gb CP020369.1 :6813515-6816088 | TCAGACTGCTGCTGCTGGTGCCTCTANNNNNNNNNNNNNNNNNNNNNNNNNNNNNNNN    | 1907 |
| gb CP020369.1 :6766573-6781964 | TCAAGCTGCTGCTGCTGCTCGTGGTACCCTGAACGTGGTCAAGACATGACTCAAGAGAC   | 2851 |
|                                | *****                                                         |      |
| gb CP020369.1 :6813515-6816088 | NNNNNNNNNNNNNNNNNNNNNNNNNNNNNNNNNNNNNNNNNNNNNNNNNNNNNNNN      | 1967 |
| gb CP020369.1 :6766573-6781964 | TG-----CCAAGCTTCGTACCGCGGCTGACTTGCTCAAGACGCTCAACGTAACGAG      | 2903 |
|                                | *****                                                         |      |
| gb CP020369.1 :6813515-6816088 | ACCAAACTGGCTGCTGCTCAACTCCGTGCTAAGGCTTCCGAGAAGGCTGCCAAAGGACAA  | 2027 |
| gb CP020369.1 :6766573-6781964 | ACTACTCTAGCTGCTGCTCAGGTTCTGTGCTAAGGCAGCCGAGAAAGCAGCCAAAGGAGAA | 2963 |
|                                | *****                                                         |      |
| gb CP020369.1 :6813515-6816088 | AGCTTGACAACAAGGATTTTCTGGTATAATTGATTCATTCGATGGATCTGATGCTGTT    | 2087 |
| gb CP020369.1 :6766573-6781964 | AGCTTGACATTTAAGGATCTTCTGGTATAATTGATAGTATGGATGGGACTGACGCAGTT   | 3023 |
|                                | *****                                                         |      |
| gb CP020369.1 :6813515-6816088 | GGTGGTAAAGAGCTTTCTAAAGAAGCTAAGGCCCGGTGAGCATCTCTGCCCGTAACCGA   | 2147 |
| gb CP020369.1 :6766573-6781964 | GGTGGCAAGAAGCTTTCGAAAGAAGCTCAAGCTATCGTGAACGTTCAATTCCGTAAACCGC | 3083 |
|                                | *****                                                         |      |
| gb CP020369.1 :6813515-6816088 | GTGATCGCCAACCCAGATCAAGATCCCAGAGTGACGGTAGTGGTGTGATCGAGTCGGTA   | 2207 |
| gb CP020369.1 :6766573-6781964 | ATGAAGGCAGACCTACCTCAGACCCAGCAGGTGTTATTGCTGAGCTGTACCAAGGGATC   | 3143 |
|                                | *****                                                         |      |
